# Supplementary material
Source: publisher figshare collection journal article supplement (https://tandf.figshare.com/ndownloader/files/20942220)
Supplement: Supplementary file 1 [file 20942220]

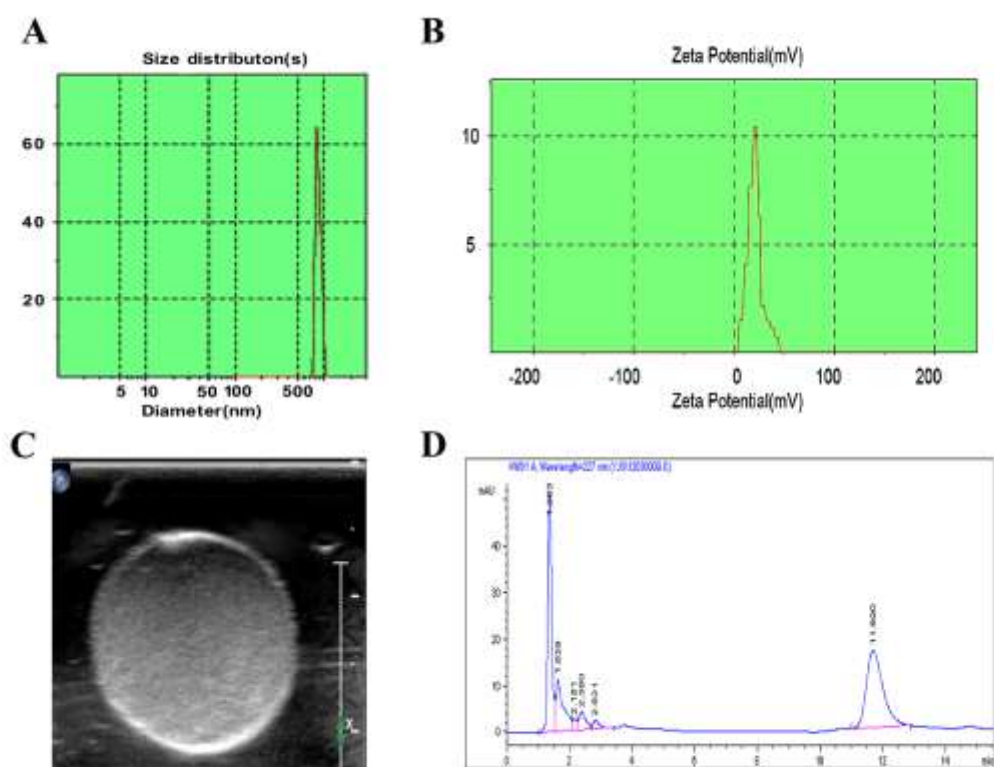

**Figure S1** (A) Size distribution of PTX-NBs-HER; (B) Zeta potential of PTX-NBs-HER; (C)Ultrasound imaging of PTX-NBs-HER; (D) High-performance liquid chromatography(HPLC) of Paclitaxel.

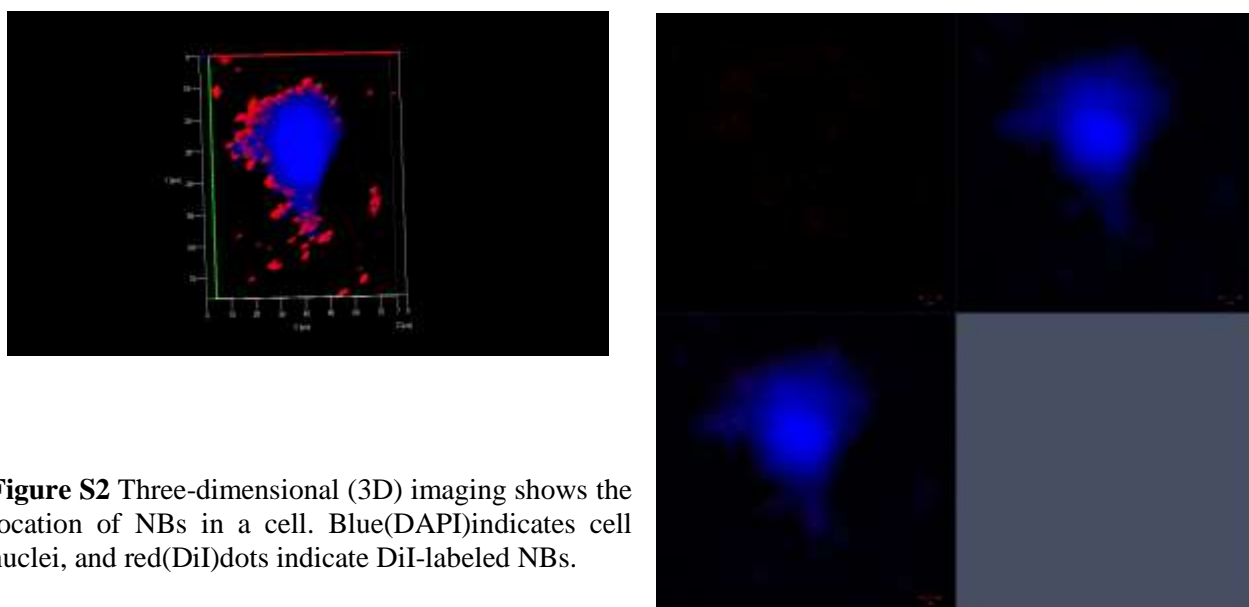

**Figure S2** Three-dimensional (3D) imaging shows the location of NBs in a cell. Blue(DAPI)indicates cell nuclei, and red(DiI)dots indicate DiI-labeled NBs.
